# Methods to assess vitamin B<sub>12</sub> bioavailability and technologies to enhance its absorption

Alex Brito, Edwin Habeych, Irma Silva-Zolezzi, Nicola Galaffu, and Lindsay H. Allen

*Vitamin B<sub>12</sub> (B-12) deficiency is still relatively common in low-, medium-, and high-income countries, mainly because of dietary inadequacy and, to a lesser extent, malabsorption. This narrative review is based on a systematic search of evidence on methods to assess B-12 bioavailability and technologies to enhance its absorption. A total of 2523 scientific articles identified in PubMed and 1572 patents identified in Orbit Intelligence were prescreened. Among the reviewed methods, Schilling's test and/or its food-based version (using cobalamin-labeled egg yolk) were used for decades but have been discontinued, largely because they required radioactive cobalt. The qualitative CobaSorb test, based on changes in circulating holo-transcobalamin before and after B-12 administration, and the <sup>14</sup>C-labeled B-12 test for quantitative measurement of absorption of a low-dose radioactive tracer are currently the best available methods. Various forms of B-12 co-formulated with chemical enhancers (ie, salcaprozate sodium, 8-amino caprylate) or supplied via biotechnological methods (ie, microbiological techniques, plant cells expressing cobalamin binding proteins), encapsulation techniques (ie, emulsions, use of chitosan particles), and alternative routes of administration (ie, intranasal, transdermal administration) were identified as potential technologies to enhance B-12 absorption in humans. However, in most cases the evidence of absorption enhancement is limited.*

## INTRODUCTION

Vitamin B<sub>12</sub> (B-12) is an essential vitamin that humans must ingest through dietary sources, including supplements or fortified food. In nature, B-12 is only present in food from animal sources.<sup>1</sup> Biochemical data indicate that the global prevalence of B-12 deficiency (based on combined low [ $<148$  pmol/L] and marginal [148–221 pmol/L] serum/plasma B-12 values) varies widely, with some countries having rates that exceed 40%.<sup>2</sup> Infants, young children, women of reproductive age, pregnant and lactating women, vegetarians, and the

elderly are groups at higher risk.<sup>2</sup> Maternal B-12 depletion or low B-12 intake during pregnancy and/or lactation increases the risk of delayed development in the offspring. This problem is exacerbated when depleted mothers exclusively breastfeed because of the low concentration of B-12 in their milk.<sup>3</sup> Older adults are at higher risk of deficiency due to physiologically impaired absorption associated with aging.<sup>4</sup>

B-12 is essential for normal erythropoiesis and neurological functions. In the cytoplasm, B-12 participates in the conversion of homocysteine to methionine, a precursor of the universal methyl group donor,

Affiliation: A. Brito is with the I.M. Sechenov First Moscow State Medical University, Moscow, Russia. E. Habeych, I. Silva-Zolezzi, and N. Galaffu are with the Nestlé Research Center, Lausanne, Switzerland. L.H. Allen is with the United States Department of Agriculture, Agricultural Research Service, Western Human Nutrition Research Center, Davis, California, USA.

Correspondence: A. Brito, Laboratory of Pharmacokinetics and Metabolomics, Institute of Translational Medicine and Biotechnology, I.M. Sechenov First Moscow State Medical University, 2-4 Bolshaya Pirogovskaya St, 119991 Moscow, Russia. E-mail: abrito@labworks.ru.

Key words: absorption, bioavailability, B-12, cobalamin, enhancers, vitamin B<sub>12</sub>.

©The Author(s) 2018. Published by Oxford University Press on behalf of the International Life Sciences Institute. All rights reserved. For permissions, please e-mail: journals.permissions@oup.com.

S-adenosylmethionine.<sup>4</sup> Thus, B-12 is required for methyl group turnover during the synthesis of creatine, phospholipids, proteins, lipids, neurotransmitters, and deoxyribonucleic and ribonucleic acids.<sup>4</sup> B-12 is also a cofactor in the intramitochondrial conversion of methylmalonyl-CoA to succinyl-CoA catalyzed by methylmalonyl-CoA mutase.<sup>4</sup> Considering the key role of B-12 in these metabolic processes, the importance of optimal status is not limited to the hematological and neurological domains but also involves general health, including energy utilization and the prevention of neural tube defects.<sup>2,3</sup> Biochemically, B-12 deficiency is usually characterized by low concentrations of the circulating serum B-12 and holo-transcobalamin (holoTC), accompanied by elevated total homocysteine in plasma and elevated methylmalonic acid in serum and urine.<sup>5</sup> As with other micronutrient deficiencies, the best approach to reduce the prevalence of B-12 deficiency is to ensure consumption of a healthy balanced diet. Low intake of food from animal sources is common in most developing countries because of poor accessibility, high cost, or cultural-religious beliefs.<sup>1</sup> As a result, B-12 supplementation programs and fortified products that target vulnerable populations could substantially reduce the prevalence of this deficiency. However, effectiveness of these approaches is conditioned by several factors, including the vitamin dose, bioavailability from the food source or delivery vehicle, frequency of supplementation, and the health and social conditions of the targeted population.<sup>6</sup>

Several endogenous and exogenous factors have been shown to profoundly affect B-12 absorption,<sup>7</sup> including genetic or acquired diseases that result in decreased production of intrinsic factor (IF),<sup>8</sup> atrophic gastritis, and malabsorption due to long-term chronic infection with *Helicobacter pylori* and/or bacterial overgrowth in the small intestine.<sup>9–13</sup> Gastrointestinal malabsorption due to inflammatory bowel disease,<sup>14</sup> celiac disease, tropical sprue, bypass or extensive resection of the ileum,<sup>15</sup> total or partial gastrectomy<sup>16</sup>; and parasitic infestations (eg, *Diphyllobothrium latum*, *Giardia lamblia*) are also recognized factors affecting B-12 absorption. Zollinger-Ellison syndrome and exocrine pancreatic insufficiency are rare causes of B-12 malabsorption caused by low pH in the small intestine and impaired degradation of transcobalamin-I by pancreatic enzymes.<sup>17</sup> Finally, B-12 malabsorption may also be iatrogenic (eg, caused by the use of gastric acid suppression medications that impair the release of B-12 from food).<sup>18,19</sup>

B-12 deficiency may be accompanied by high folate status because of mandatory folic acid fortification of flour in many countries.<sup>20</sup> A negative biochemical

interaction between high serum folate and biomarkers of B-12 status has been reported in the National Health and Nutrition Examination Survey and other studies that were mainly conducted in the elderly.<sup>21–26</sup> In addition, some studies have found a negative association between high folate/low B-12 status and cognitive impairment, anemia, and slower nerve conductivity.<sup>21–26</sup> Of particular concern are women during the perinatal period, when future mothers may be exposed to higher amounts of folic acid because of the potential combination of mandatory fortification and folic acid supplementation. For example, in India the prevalence of insulin resistance was higher in offspring from mothers with low serum B-12 (<160 pmol/L) and high red blood cell folate (>1144 vs 807 nmol/L) during pregnancy, as found in the Pune Maternal study.<sup>27</sup> Concerns about excessive folic-acid exposure have also been extended to associations with unmetabolized folic acid, which increases when folic-acid intakes are high.<sup>28</sup> These interactions remain controversial, and randomized controlled trials are needed to substantiate any adverse effects of high folic-acid intake on B-12 status and function. Meanwhile, it is sensible to ensure adequate B-12 intake, absorption, and status, particularly in countries with mandatory folic-acid fortification, where supplementation of folic acid is also common practice across the population and in individuals at risk of B-12 deficiency.

B-12 bioavailability has been studied for decades, and some technologies to enhance the absorption of B-12 have been developed. However, there is uncertainty about the efficacy of different methods, and there has been no critical discussion of existing technologies for measuring and enhancing absorption. This work provides a critical review of the available literature on methodologies to study B-12 bioavailability and technologies to enhance its absorption.

### **Mechanisms of B-12 absorption: key for methodological and technological development**

Active absorption starts when B-12 is released from food and is bound by salivary transcobalamin-I (haptocorrin) (Figure 1).<sup>29</sup> Simultaneously, gastric parietal cells produce hydrochloric acid and IF stimulated by histamine, gastrin, and acetylcholine.<sup>30</sup> In the stomach, haptocorrin protects B-12 from acid degradation, but once in the duodenum, the protein is partially degraded by pancreatic trypsin favoring transfer to IF, which is more resistant to proteolysis. The distal ileum is the primary absorption site of the B-12–IF complex, which is taken up via receptor-mediated calcium-dependent active transport. The complex binds to the cubam receptor (consisting of cubilin and a receptor-associated

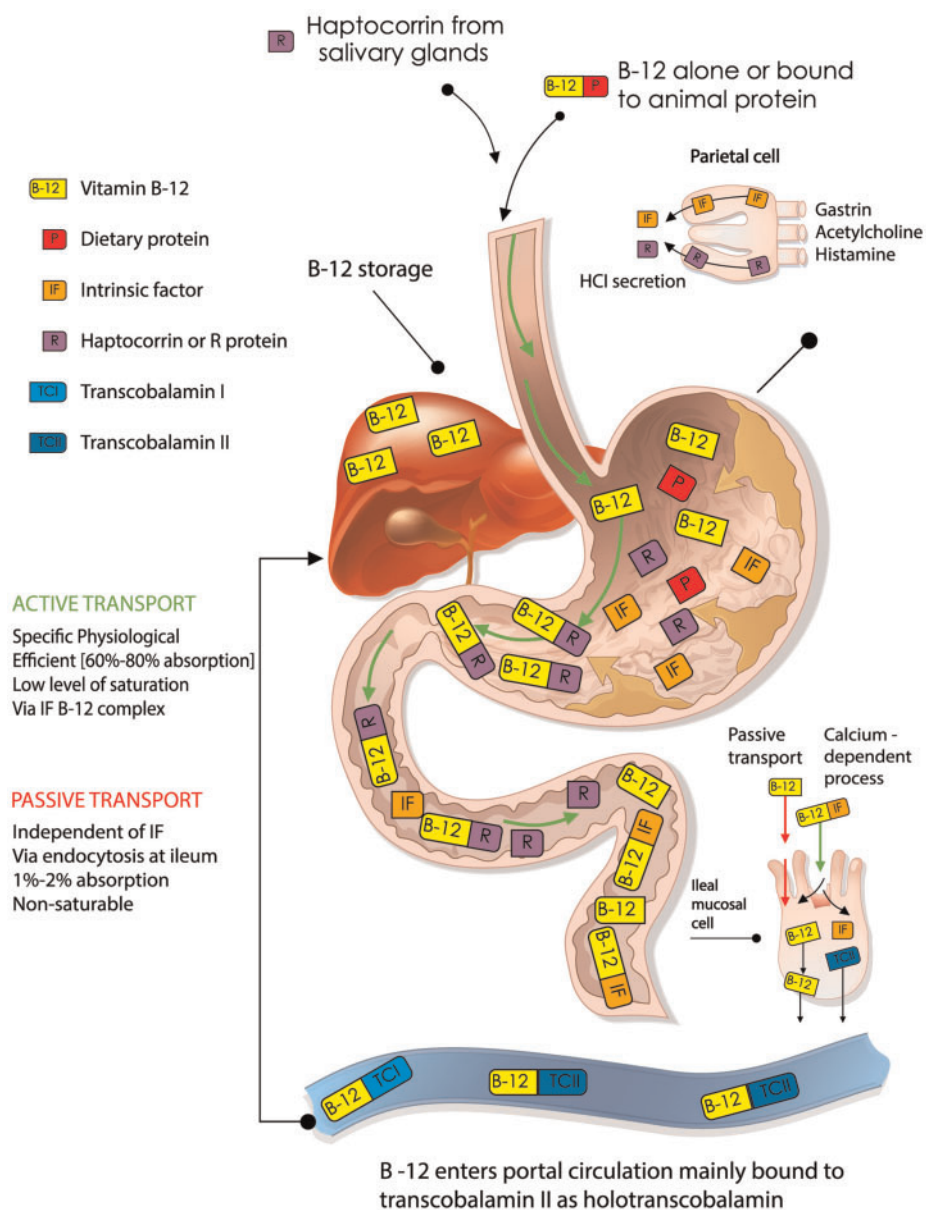

**Figure 1 Vitamin B<sub>12</sub> absorption.** Active absorption of dietary B-12 in humans is a complex, multistep process. First, B-12 is released from food proteins by proteolysis in the acidic stomach and bound to salivary haptocorrin, which protects B-12 from acid degradation. Second, the B-12-haptocorrin complex is degraded due to the action of pancreatic trypsin and then binds to intrinsic factor (IF), a glycoprotein produced by the gastric parietal cells (that secreted hydrochloric acid) upon stimulus by histamine, gastrin, and acetylcholine. Third, the B-12-IF complex enters the mucosal cells in the distal ileum by cubam receptor-mediated endocytosis. Fourth, after internalization within the ileal enterocyte, the IF-B-12 complex enters lysosomes in which IF is degraded. Then, the B-12 is either metabolized to its active cofactor forms for use within the enterocyte or processed for release into the portal circulation. Abbreviations: HCl, hydrochloric acid; IF, intrinsic factor.

protein).<sup>18,31,32</sup> Upon its internalization within the ileal enterocyte, IF is degraded in lysosomes, releasing the free B-12. Subsequently, B-12 is either metabolized to its active cofactor forms for use within the enterocyte or transferred into the portal circulation by the ABC drug transport protein ABCC1 (also known as multidrug resistance protein 1). The free cobalamin binds to unsaturated transcobalamin II (TC) and is transported as holoTC in serum, from which it is taken up by cells.<sup>33</sup>

Uptake of the TC-B-12 complex into tissues occurs by receptor-mediated endocytosis. HoloTC is then degraded in lysosomes, releasing B-12 to be further converted to its cofactor forms. Between 0.5 and 5.0 µg of B-12 is excreted in bile per day. This biliary B-12 is readily reabsorbed across the ileal enterocyte, and thus enterohepatic circulation represents a mechanism by which B-12 is recycled in the body.<sup>2</sup> A small fraction of overall B-12 absorption (~1%-2% of an oral dose)

occurs by passive diffusion.<sup>2</sup> This pathway is inefficient but important, especially in populations with low or zero IF (eg, gastrectomized patients). Passive absorption of B-12 also occurs in mucous membranes when it is administered into the nose.<sup>34</sup>

## METHODOLOGY

### Identification and selection of studies and patents

A systematic search of scientific articles complemented by an exhaustive search of published patents was conducted in June 2017 and revised in July 2017. Evidence regarding B-12 absorption, B-12 bioavailability, and technologies to enhance the absorption of B-12 was considered. Combinations of the terms (“vitamin B-12” OR “vitamin B12” OR “cobalamin”) AND (“bioavailability” OR “absorption”) were used in PubMed. In addition, commercial websites were assessed to identify potential sources of information. The exhaustive search of patents was done in Orbit Intelligence (Paris, France), an integrative database for intellectual and industrial property. Patents were selected using a search engine based on the combination of the following keywords: “vitamin B-12” OR “vitamin B12” OR “cobalamin”; “absorbed” OR “absorption” OR “digestion” OR “bioavailability” OR “uptake”; “microorganism” OR “probiotic” OR “lactobacilli” OR “reuteri” OR “gasseri” OR “bifidobacter” OR “longum” OR “bifidus.” Patent classes A23L1–C12N were considered for identification of food particles and the use of microorganisms or enzymes in the formulation. The figure was plotted using Adobe Illustrator version 11.0 (Adobe System, San Jose, CA, USA).<sup>35</sup>

### Eligibility criteria and study selection

The majority of the evidence reported in this review was based on intestinal absorption of B-12, with a limited number of publications focused on absorption by nonintestinal routes. This review considered any evidence relevant to the development of methodologies to assess B-12 bioavailability and technologies to enhance B-12 absorption regardless of absorption route. In vivo and in vitro studies were included; studies conducted in humans, animals, or cells were also considered. In the case of clinical human studies, those that focused on application of methods to assess B-12 absorption in pathologies were excluded, unless the information was relevant to the context of methodological or technological development. Studies were not excluded based on language or year of publication.

## RESULTS AND DISCUSSION

A total of 2523 studies were identified in PubMed. After exclusion of 2225 studies because the information was not eligible or relevant for the present review, 298 studies were initially selected. After in-depth review of the titles and abstracts, an additional 188 studies were excluded, leaving 75 studies focused on methods and 35 studies focused on technologies. Finally, 72 studies for methods and 26 for technology were included in the review after further exclusions as well as inclusions of references recommended by experts in the field and 1 patent found for methods (Figure 2A). A total of 1572 patents were identified in Orbit Intelligence, 1113 of which were excluded after checking eligibility criteria. From this total of 459 early selected patents, 42 were selected for final inclusion, after exclusion of those not relevant (Figure 2B).

### Methods to measure vitamin B<sub>12</sub> absorption

Schilling’s test, the egg-yolk cobalamin absorption test, the CobaSorb test, and the use of <sup>14</sup>C-labeled B-12 are the main methods used to assess B-12 absorption. Table 1 summarizes these methods.

*Assessment of bioavailability using colabeled B-12 and Schilling’s test for malabsorption.* The first attempts to quantify B-12 absorption were conducted several decades ago.<sup>36</sup> Pioneering work used B-12 radioactively labeled with <sup>57</sup>Co, <sup>58</sup>Co, or <sup>60</sup>Co with 1–100 nanocuries (nCi).<sup>37–47</sup> The most common approach consisted of giving individuals a dose of labeled B-12 and calculating absorption based on recovery of the unabsorbed isotope in urine and/or feces.<sup>48–57</sup> An alternative third approach that involves performing serum counting of the isotope has been proposed.<sup>42,58–61</sup> Among these different methods, the Schilling’s test, which is described in detail below, has received the most attention and application.

The Schilling’s test was the gold-standard test used for decades to detect defective B-12 absorption, especially in patients with B-12 deficiency, and to diagnose malabsorption in the elderly. The multiple-stage method was developed by Professor Robert F. Schilling<sup>62–66</sup> and tested in both humans and animals.<sup>67</sup> In the first stage of the method, oral administration of radiolabeled B-12, usually as <sup>57</sup>Co or <sup>58</sup>Co, was followed an hour later by a 1-mg intramuscular dose of unlabeled B-12 that aimed to saturate blood transport of B-12 and ensure that a measurable amount of isotope appears in the urine during the first 24 hours.<sup>62</sup> If < 10% of the oral dose appeared in urine, the diagnosis was malabsorption. In the second stage, if abnormal absorption was found, the test was repeated with the addition of a



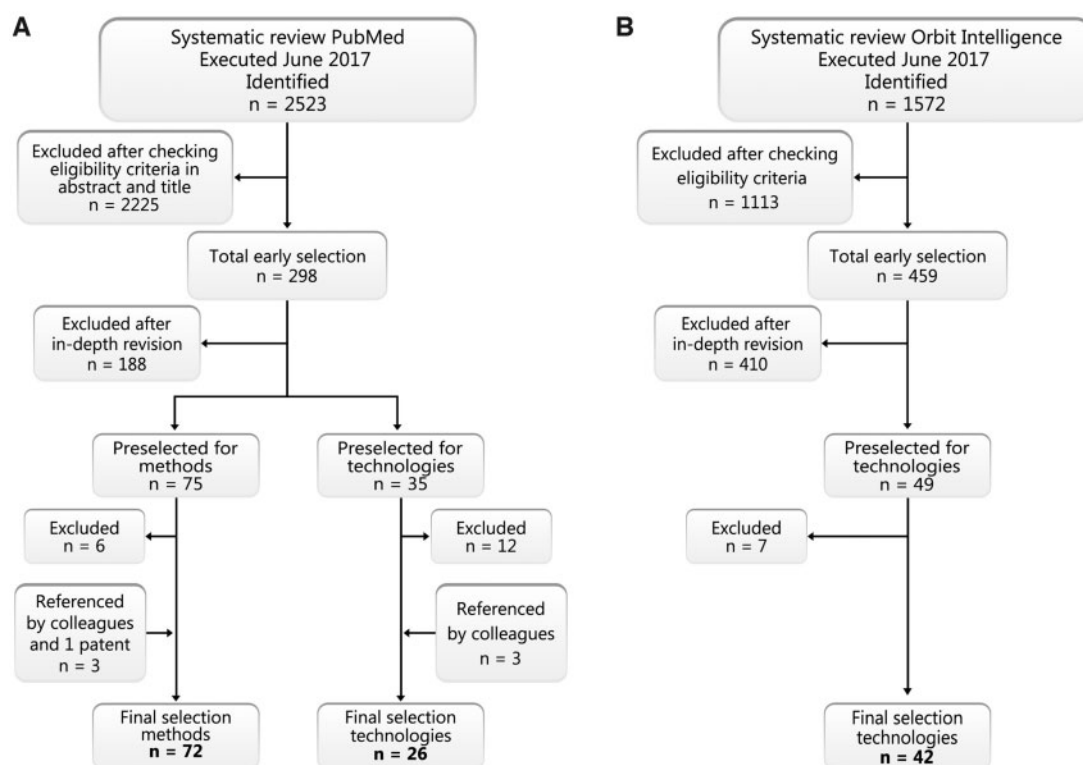

Figure 2 **Systematic search.** **A**, Systematic search of methods and technologies in PubMed. **B**, Systematic search of patents for technologies in Orbit Intelligence.

Table 1 **Methodologies to measure vitamin B<sub>12</sub> absorption**

| Method                                 | General description                                                                                                                                                                                                                                                                                                                                                                                                  | Advantages                                                                                                                                                                                                          | Limitations                                                                                                                                                                                                                                                                                                                                                                            |
|----------------------------------------|----------------------------------------------------------------------------------------------------------------------------------------------------------------------------------------------------------------------------------------------------------------------------------------------------------------------------------------------------------------------------------------------------------------------|---------------------------------------------------------------------------------------------------------------------------------------------------------------------------------------------------------------------|----------------------------------------------------------------------------------------------------------------------------------------------------------------------------------------------------------------------------------------------------------------------------------------------------------------------------------------------------------------------------------------|
| Schilling's test                       | Tests based on oral administration of radioactive B-12 labeled mainly with <sup>57</sup> Co and/or <sup>58</sup> Co. An intramuscular dose (1 mg) of unlabeled B-12 is given 1 h later, and urine radioactivity is measured during the first 24 h. If <10% of the oral dose appears in urine, this is defined as diagnosing malabsorption. Repetition of the test is suggested with IF to diagnose pernicious anemia | Mainly used to diagnose malabsorption in the elderly or in pernicious anemia<br>Widely used in the past in clinical practice                                                                                        | Provides a qualitative estimate of B-12 absorption<br>Requires exposure to radioactivity<br>In its simplest form does not assess absorption from B-12 in food<br>Need to collect a complete urine sample for 24 h (often difficult in elderly people)<br>Not currently used due to lack of availability of radiolabeled B-12 required for the test, high cost, difficulty for patients |
| The egg-yolk cobalamin absorption test | Modification of Schilling's test, by mixing the labeled B-12 with albumin, egg yolk, or chicken                                                                                                                                                                                                                                                                                                                      | Most often used in clinical investigations                                                                                                                                                                          | Same limitations as Schilling's test except that it can detect malabsorption of the vitamin bound to food                                                                                                                                                                                                                                                                              |
| CobaSorb test                          | By giving 3 9-μg doses of crystalline B-12 in water over the period of 24 h and measuring the increase in serum holoTC on the following day, malabsorbers can be detected                                                                                                                                                                                                                                            | Detection of B-12 malabsorption<br>Useful for determining if patients will respond to low-dose B-12 supplements or require treatment with pharmacological doses<br>Readily available for diagnostic or research use | Qualitative assay. It measures relative absorption but does not provide a quantitative estimate of bioavailability<br>The test cannot be used once the patient is treated with B-12                                                                                                                                                                                                    |
| <sup>14</sup> C-labeled B-12           | Biotechnological production of <sup>14</sup> C-B-12. Measurement of the isotope excreted in urine and feces by accelerator mass spectrometry                                                                                                                                                                                                                                                                         | Very low dose of radioactivity<br>Quantitative estimate of the percentage absorbed<br>Test for food-bound absorption or crystalline form                                                                            | Not yet been developed into a clinical test                                                                                                                                                                                                                                                                                                                                            |

Abbreviations: C, carbon; CO, cobalt; holoTC, holo-transcobalamin; IF, intrinsic factor.

dose of oral IF mixed with water.<sup>68</sup> If the second urine collection contained >10% of the oral dose, this was a sign of poor IF production and led to the identification of probable pernicious anemia.<sup>69</sup> For confirmation of pernicious anemia, an augmented Schilling's test was proposed by which patients who failed to respond to the standard test received 8 times the conventional dose.<sup>70</sup> Many modifications and alternatives have been proposed through the years, including giving different cobalt radioisotopes, usually <sup>57</sup>Co and <sup>58</sup>Co, at the same time and thus only requiring a single radioactive urine collection (a double-isotope technique)<sup>71–76</sup>; using labeled B-12 co-ingested with antibiotics to identify patients with bacterial overgrowth; and providing labeled B-12 with pancreatic enzymes to identify patients with pancreatitis.<sup>77</sup> Validation of Schilling's test was a topic of interest,<sup>78–80</sup> often used for comparative purposes against other methods of assessing absorption. For example, an effort to introduce an unlabeled B-12 technique failed after comparison with Schilling's test.<sup>81</sup>

An alternative to Schilling's test was the fractional B-12 absorption test "FAB12," a double-isotope technique that included the addition of carmine powder, <sup>51</sup>Cr-chromic chloride, and a single stool sample test, as well as a complete stool collection.<sup>82,83</sup> The fractional B-12 absorption test based on a single stool sample that had the highest content of <sup>51</sup>Cr (corresponding to the most carmine-colored stool) correlated closely with the fractional B-12 absorption test based on complete stool collection.<sup>82,83</sup> Nowadays, Schilling's test and alternatives methodologies, such as the double-isotope Schilling's test for measuring absorption of food-bound and free B-12 simultaneously,<sup>84</sup> have virtually disappeared from standard clinical practice. The main reasons for this are 1) difficulties implementing the tests, including failure of the simpler standard Schilling test to detect food-bound B-12 malabsorption; 2) lack of availability of radiolabeled B-12; 3) the need to dose with radioactivity and to accurately collect patient's urine for 24 hours; and 4) high cost.

*Egg-yolk cobalamin absorption test.* Schilling's test was usually performed with B-12 in its crystalline form without considering the food matrix effect. However, to detect food cobalamin malabsorption, the test was modified by mixing labeled B-12 with egg yolk (the egg-yolk cobalamin absorption test). Other proteins such as albumin,<sup>85</sup> chicken serum, or chicken meat were also used, but egg yolk was most predominant. This approach was used frequently in clinical research studies.<sup>86,87</sup>

*CobaSorb test for cobalamin malabsorption.* The CobaSorb is one of the most advanced and reliable tests available for diagnosis of B-12 malabsorption. This

qualitative assay is based on the analysis of cyanocobalamin carried as holoTC (the active form of B-12) in serum before and after oral intake of the vitamin.<sup>88</sup> This test is the most readily available for diagnostic or research use.<sup>88,89</sup>

Lindgren and coworkers<sup>90</sup> demonstrated that holoTC is a sensitive marker of cobalamin malabsorption by showing a high correlation between cobalamin malabsorption and holoTC in patients with low levels of holoTC (<35 pmol/L). Later, Bor and collaborators<sup>91</sup> also showed that holoTC concentrations (and TC saturation) reflected B-12 absorption better than serum B-12 levels because holoTC concentrations and TC saturation produced a higher increase than serum B-12 after oral administration of 3 high physiological doses (9 µg) of B-12.

The CobaSorb test was further performed in patients with inherited malabsorption of B-12 attributable to Imerslund-Gräsbeck syndrome or with IF deficiency, their heterozygous biological parents, and healthy controls.<sup>92</sup> Three 9-µg doses of B-12 were given orally at 6-hour intervals, and serum B-12 and holoTC were measured 24 hours after the last dose was given. In the patients, there were no changes in B-12 or holoTC after the B-12 load, whereas in controls there were increases in B-12 and holoTC.<sup>92</sup> Thus, the CobaSorb test was able to confirm that holoTC was the best marker for reflecting B-12 absorption.<sup>93</sup> The performance of the test was evaluated using a cutpoint for holoTC or B-12 of <75% percentile of healthy absorbers. Changes were well-reflected by an increase in holoTC after 2 days of administration of oral B-12.<sup>93</sup> Further assessments included the optimal timeline for B-12 administration and the magnitude and patterns of change in the postabsorption response of holoTC to oral B-12.<sup>94</sup> Healthy adults with normal B-12 status were given the 3 9-µg doses of B-12 at 6-hour intervals beginning early in the morning (baseline) on day 1. Blood was taken at 17 timed intervals over the course of 3 days for analyses of holoTC and other indicators of B-12 status.<sup>94</sup> The timeframe for this methodology is based on the observation that the greatest increase in holoTC was observed 24 hours after B-12 ingestion.<sup>94</sup> By measuring the different forms of cobalamin isolated by high-performance liquid chromatography and quantified with an enzyme-linked immunosorbent assay,<sup>88</sup> the CobaSorb test showed that cyanocobalamin is absorbed unchanged in healthy individuals, indicating that cyanocobalamin bound to TC reflects B-12 absorption better than the total B-12 bound to TC.<sup>88</sup> Increases in serum holoTC have also been used to reliably assess B-12 absorption in individuals with low serum B-12.<sup>95</sup> For example, in the Pune Maternal Study in India, a population for which the main cause of B-12 deficiency

is presumably low intake of food from animal sources, participants had a rise in serum holoTC concentrations (a proxy for B-12 absorption) after they were given a standard dose of oral B-12.<sup>95</sup>

The CobaSorb test has also been used to investigate whether treatments with intramuscular B-12 injections were effective in patients with B-12 deficiency and to identify individuals able to absorb B-12 orally versus the parenteral route.<sup>89</sup> The study highlighted the importance of considering the capacity of an individual to absorb B-12 prior to treatment.<sup>89</sup> The CobaSorb test has also served biochemical validation purposes—for example, to validate the commercial enzyme immunoassay kit for measurement of holoTC.<sup>96</sup>

Currently, the CobaSorb test is based on giving 9- $\mu$ g doses of crystalline B-12 in water 3 times over a 24-hour period and measuring the increase in serum holoTC on the following day to identify malabsorbers. To detect an increase in holoTC, the test has to be performed before participants are treated for B-12 deficiency. Detection of B-12 malabsorption using the CobaSorb test can help to determine whether patients will respond to low-dose B-12 supplements or require treatment with pharmacological doses of the vitamin, either oral or parenteral. The CobaSorb test measures relative absorption, and it is important to recognize that it does not provide a quantitative estimate of bioavailability.<sup>97</sup>

*Assessment of bioavailability using <sup>14</sup>C-labeled B-12.* Accelerator mass spectrometry has been proposed for assessing absorption and kinetics of <sup>14</sup>C-labeled substances after oral ingestion and can measure levels of isotopic carbon in tiny volumes (microliters) of biological samples with negligible exposure to radioactivity. The radioactivity from this tracer can be measured at doses as low as approximately 30 nCi, which makes it an excellent alternative for human feeding trials that require detection of absorbed radioactivity in plasma or urine for a long period of time. The <sup>14</sup>C-labeled B-12 is produced by growing *Salmonella enterica* in a medium containing <sup>14</sup>C dimethylbenzimidazole, which results in cobalamin labeled in the dimethylbenzimidazole ring rather than cobalt in the corrin ring.<sup>98</sup> The test has been used with doses of B-12 in the range of normal dietary intake (1.4–2.6  $\mu$ g). In humans, a physiological dose (1.5  $\mu$ g, 2.2 kilobecquerel/59 nCi) of purified <sup>14</sup>C-labeled B-12 was administered, and it showed plasma appearance and clearance curves consistent with the predicted behavior of the natural vitamin. <sup>14</sup>C-labeled B-12 has been used to measure bioavailability from chicken eggs labeled in vivo by injecting hens once a day with the labeled vitamin over a 4-day period (unpublished data). A high sensitivity of the test was

observed compared with the use of labeled cobalt (as in the Schilling's test) in an intervention where a single dose of labeled eggs given to humans showed a several-fold increase of radioactive cobalamin in urine after 8 days of urine and feces collection. Because the <sup>14</sup>C was incorporated into the dimethylbenzimidazole ring, the outcome of this study suggested that the moiety is detached from the unabsorbed vitamin in the intestine, probably by bacteria.<sup>98</sup> The <sup>14</sup>C-labeling method confirmed that the relative bioavailability was inversely proportional to the dose consumed due to saturation of the active absorption receptor, even within the range of usual intake from foods.<sup>1</sup> This method has not yet been developed into a clinical test, but it opens new avenues for studying B-12 assimilation and kinetics in humans.<sup>98</sup>

### Efficiency of absorption of a single oral dose of vitamin B<sub>12</sub> across a range of intakes

The first studies based on radioactive isotopes showed that the efficiency of absorption of B-12 was inversely proportional to the dose. Indeed, 50% absorption was observed for a 1- $\mu$ g oral dose, 20% for a 5- $\mu$ g dose, and approximately 5% for a 25- $\mu$ g dose.<sup>99,100</sup> After 4–6 hours there was no inhibitory effect of the first dose on the absorption of subsequent doses.<sup>49</sup> At doses  $\geq$  500  $\mu$ g, only 1% was absorbed.<sup>101</sup> The reason for this is saturation of the B-12-IF receptors in the ileum at higher doses. Although, the B-12-IF complex receptor is saturated at relatively low doses, 1%–2% of an oral dose is passively absorbed from any level of intake that exceeds the specific binding capacity of IF in the digestive tract.<sup>36</sup>

### Vitamin B<sub>12</sub> bioavailability from foods

In general, an absorption of 50% of the vitamin from food is assumed when estimating, for example, B-12 requirements.<sup>100,102</sup> Studies assessing bioavailability of B-12 from different food sources in healthy participants showed that absorption ranges 36%–24% for egg products (dose 0.3–0.94  $\mu$ g, respectively), 83%–52% for lean meat (dose 0.54–5.11  $\mu$ g, respectively), 42%–30% for fish (dose 2.1–13.1  $\mu$ g, respectively) and 49%–4.5% for liver products (dose 0.5–38  $\mu$ g, respectively). The turnover of the vitamin in these studies was measured as loss in body radioactivity after administration of a dose of radioactive co-labeled B-12 or as B-12 excretion in bile corrected for estimated reabsorption.<sup>103</sup> In the case of B-12 bound to food, the proteins present in the meal increase the intragastric pH,<sup>104</sup> a situation that is sensed by antral G cells, triggering the release of gastrin, which increases the secretion of hydrochloric acid and IF by

the parietal cells.<sup>105</sup> In such a situation, the higher secretion of IF is hypothesized to play a key role in increasing the efficiency of B-12 absorption from protein-bound B-12.

### Technologies to enhance B-12 absorption

Information on technologies to enhance B-12 absorption that was found in the scientific articles and patents included in this review was organized and classified into 4 main categories: 1) different forms of B-12 coformulated with enhancers; 2) alternative biotechnological solutions; 3) encapsulation technologies; and 4) alternative routes of administration (Table 2).<sup>106–174</sup> Technological solutions have focused on both passive and active absorption mechanisms. An example of a technological solution that aims to enhance B-12 absorption using the regular B-12 active absorption process is the use of B-12 bound to transport proteins, including IF or conjugates of B-12 proteins or peptides. Other technologies, such as the use of salcaprozate sodium (SNAC), have been proposed to enhance B-12 absorption via passive diffusion. Among the different technological solutions proposed in the literature, only B-12 formulated with SNAC and B-12 formulated with recombinant human IF were identified as having fairly good evidence of their enhancing effect on the absorption of B-12; strong scientific evidence is lacking for other proposed technologies.

*Different forms of B-12 coformulated with enhancers.* Ding et al<sup>106</sup> reported the enhanced absorption of B-12 coformulated with SNAC via the formation of noncovalent complexes capable of transcellular passage without altering tight junctions. Later, Castelli and colleagues<sup>107</sup> reported improved B-12 bioavailability of an oral formulation of cyanocobalamin with SNAC (4.7%) versus commercially available cyanocobalamin (2.2%) when given as a single 5-mg dose in healthy individuals. The efficacy and tolerability of the B-12 formulation with SNAC was further investigated in individuals with serum B-12 concentrations < 350 pg/mL<sup>108</sup>. A dose of 1000 µg/day of B-12 in this oral formulation was provided to 22 patients for 90 days. The effects on B-12 levels were compared with that of 26 patients who were administered 1000 µg of intramuscular B-12 on 9 occasions for 90 days. Both the oral and intramuscular formulations were effective in restoring normal B-12 status, and no differences or adverse effects were attributed to the use of SNAC. At those levels of B-12 provision and at those frequencies, B-12 status would be expected to improve with or without inclusion of SNAC in the oral formulation. Therefore, this study was unable to prove the absorption-enhancing property of

SNAC because B-12 status was improved by B-12 provision, rather than by addition of the potential enhancer.

B-12 bound to transport proteins, IF, or conjugates of B-12 proteins or peptides has been proposed as a way to administer bioavailable B-12. Cobalamin transport proteins are not limited to IF, but also include transcobalamin-I, transcobalamin-II, and transcobalamin-III.<sup>109–115</sup> A TC-B-12 complex derived from bovine milk has been highlighted for its capacity to stimulate the uptake of B-12 in cultured bovine, mouse, and human cell lines.<sup>116</sup> The complex stimulated the uptake of B-12 via the apical surface of differentiated Caco-2 human intestinal epithelial cells.<sup>116</sup> In rats, however, cobalamin bound to bovine milk proteins was absorbed as efficiently as free cobalamin, and comparable amounts of hydroxocobalamin (the main form in animal products, including milk) and cyanocobalamin were absorbed. Interestingly, hydroxocobalamin was found to accumulate at 3-fold higher levels in the liver than cyanocobalamin, while less remained in the kidney and plasma.<sup>117</sup> The efficacy and metabolism of these forms of B-12 should be examined in clinical studies, as well as in isolated intestinal tissue and whole animals, to confirm in vitro data.

Oral combinations of 8-amino caprylate or amino derivatives,<sup>118,119</sup> mixtures of B-12 chemical forms,<sup>120–123</sup> B-12 formulations with D-sorbitol,<sup>124–126</sup> poly(acrylic acid)-cysteine,<sup>127</sup> diterpene glycoside and triterpene glycoside,<sup>128–130</sup> B-12 bound by a glycoprotein matrix,<sup>131</sup> and resin adsorbate have been proposed for the administration of B-12.<sup>132</sup> However, it is unclear whether there is a formulation effect on B-12 bioavailability and what mechanisms are involved, as well as to what extent better absorption should be expected.

*Alternative biotechnological solutions.* The evidence of biotechnological solutions for enhancement of absorption is limited except for evidence for binding B-12 to recombinant human IF. Fedosov and colleagues<sup>133</sup> suggested the use of a recombinant human IF expressed in the plant *Arabidopsis thaliana* as an approach to enhance B-12 absorption. The IF produced by this method bound B-12 and interacted with the cubilin receptor with good or better affinity than human IF.<sup>133</sup> Using the CobaSorb test, Hvas and colleagues demonstrated that the recombinant human IF promoted B-12 absorption among patients with evident B-12 deficiency.<sup>134</sup> There are several commercial sources of recombinant human IF, but to the authors' knowledge it is not being used clinically. Many commercial B-12 supplements now contain porcine-derived IF, but the amount of B-12 is also very large, and it is unclear whether the IF has additional benefit, especially considering that the supplements would usually be consumed only once a day.



**Table 2 Technologies identified as potential enhancers of vitamin B<sub>12</sub> absorption**

| Technology                                                                         | Description                                                                                                                                                                                                                                       | References                                                                                                                                                                                                                                                                                                                                                                                                                                                                                                             |
|------------------------------------------------------------------------------------|---------------------------------------------------------------------------------------------------------------------------------------------------------------------------------------------------------------------------------------------------|------------------------------------------------------------------------------------------------------------------------------------------------------------------------------------------------------------------------------------------------------------------------------------------------------------------------------------------------------------------------------------------------------------------------------------------------------------------------------------------------------------------------|
| Different forms of B12 coformulated with enhancers                                 |                                                                                                                                                                                                                                                   |                                                                                                                                                                                                                                                                                                                                                                                                                                                                                                                        |
| B-12 formulation with salcaprozate sodium as absorption enhancer                   | Salcaprozate sodium has been proposed to enhance B-12 absorption by forming a noncovalent complex that enables transcellular absorption without altering tight junctions                                                                          | Ding et al (2004) <sup>106</sup> , Castelli et al (2011) <sup>107</sup> , Castelli et al (2011) <sup>108</sup>                                                                                                                                                                                                                                                                                                                                                                                                         |
| B-12 bound to transport proteins, IF, or conjugates of B-12 proteins or peptides   | B-12 transport proteins are administered in combination with B-12. Cobalamin transport proteins include, but are not limited to IF, transcobalamin-I, transcobalamin-II, and transcobalamin-III. Formulations include proteins conjugated to B-12 | Ellenbogen et al (1962) <sup>109</sup> , Oertli R (1957) <sup>110</sup> , Collins (2003) <sup>111</sup> , Russell-Jones et al (1994) <sup>112</sup> , Seetharam and Bose (2001) <sup>113</sup> , Serfontein (1994) <sup>114</sup> , Habberfield et al (1996) <sup>115</sup> , Hine et al (2014) <sup>116</sup> , Williams and Spray (1968) <sup>117</sup>                                                                                                                                                              |
| B-12 formulation with 8-amino caprylate or amino derivates as absorption enhancers | Oral preparations containing combinations of 8-amino caprylate or amino derivatives                                                                                                                                                               | Yuhong (2012) <sup>118</sup> , Castelli and Kragie (2009) <sup>119</sup>                                                                                                                                                                                                                                                                                                                                                                                                                                               |
| B-12 formulations containing mixtures of B-12 chemical forms to enhance absorption | Mixtures of chemical forms, including cyanocobalamin, adenosylcobalamin, hydroxocobalamin, methylcobalamin, in substantially equivalent ratios and with pharmaceutically acceptable carriers                                                      | Brown (2013) <sup>120</sup> , Brown (2007) <sup>121,122</sup> , Brown (2006) <sup>123</sup>                                                                                                                                                                                                                                                                                                                                                                                                                            |
| B-12 formulation with D-sorbitol as absorption enhancers                           | This polyhydric alcohol received attention as an enhancer of B-12 absorption with studies in humans and animals                                                                                                                                   | Okuda (1961) <sup>124</sup> , Okuda et al (1960) <sup>125</sup> , Authors Unknown (1959) <sup>126</sup>                                                                                                                                                                                                                                                                                                                                                                                                                |
| Poly(acrylic acid)-cysteine-based formulations                                     | The oral administration of B-12 with poly(acrylic acid)-cysteine improved B-12 absolute bioavailability compared with B-12 with buffer, verapamil, and glutathione                                                                                | Sarti et al (2013) <sup>127</sup>                                                                                                                                                                                                                                                                                                                                                                                                                                                                                      |
| Use of diterpene glycoside and triterpene glycoside                                | Formulations for immediate release comprising B-vitamins developed with the addition of diterpene glycoside and triterpene glycoside                                                                                                              | Burge et al (2016) <sup>128</sup> , Copp (2016) <sup>129</sup> , Koch et al (2015) <sup>130</sup>                                                                                                                                                                                                                                                                                                                                                                                                                      |
| B-12 bound by a glycoprotein matrix                                                | Formulation comprising B-12 bound by a glycoprotein matrix                                                                                                                                                                                        | Chokshi (2002) <sup>131</sup>                                                                                                                                                                                                                                                                                                                                                                                                                                                                                          |
| Use of resin                                                                       | Resin adsorbate proposed for the administration of B-12                                                                                                                                                                                           | Davis et al (1982) <sup>132</sup>                                                                                                                                                                                                                                                                                                                                                                                                                                                                                      |
| Alternative biotechnological solutions                                             |                                                                                                                                                                                                                                                   |                                                                                                                                                                                                                                                                                                                                                                                                                                                                                                                        |
| Plant cells for expression of cobalamin binding proteins                           | Plant cells are transformed with nucleotide sequences adapted for expression and secretion of B-12 binding proteins                                                                                                                               | Fedosov et al (2003) <sup>133</sup> , Hvas et al (2006) <sup>134</sup>                                                                                                                                                                                                                                                                                                                                                                                                                                                 |
| Microbiological technologies                                                       | Microbiological technologies include natural enrichment of beverages with multiple vitamins by fermentation or the use of probiotics                                                                                                              | Hugenholtz and Strachotta (2014) <sup>135</sup> , Kelemen et al (1987) <sup>136</sup> , Johan et al (1976) <sup>137</sup> , Szemler et al (1971) <sup>138</sup> , Mogna et al (2013) <sup>139</sup> , Mogna et al (2012) <sup>140</sup> , Adams and Huang (2003) <sup>141</sup> , Hugenschmidt et al (2011) <sup>142</sup> , Madhu et al (2010) <sup>143</sup> , Zelder et al (2008) <sup>144</sup> , Bijl and Sardjoepersad (2004) <sup>145</sup> , Bijl (1998) <sup>146</sup> , Berglund et al (2003) <sup>147</sup> |
| Encapsulation techniques                                                           |                                                                                                                                                                                                                                                   |                                                                                                                                                                                                                                                                                                                                                                                                                                                                                                                        |
| Emulsions                                                                          | Method for delivering B-12 via a suspension or emulsion of water-soluble vitamins and/or minerals in edible oils                                                                                                                                  | Schramm et al (2008) <sup>148</sup> , Schramm and McGrath (2005) <sup>149</sup>                                                                                                                                                                                                                                                                                                                                                                                                                                        |
| Chitosan nanoparticles as delivery agent                                           | A chitosan derivative capable of being specifically absorbed by the small intestine accompanied by a preparation method and a drug-carrying nanoparticle of the derivative and B-12                                                               | Yang et al (2017) <sup>150</sup> , Goto et al (2015) <sup>151</sup>                                                                                                                                                                                                                                                                                                                                                                                                                                                    |
| Hydrogels and hydrophilic polymers for sustained release dosage                    | Oral administration of a sustained release nutritional supplement containing B-12, which elevates B-12 in plasma for a period of at least 12 h after ingestion                                                                                    | Smidt et al (2009) <sup>152</sup>                                                                                                                                                                                                                                                                                                                                                                                                                                                                                      |

(continued)

Table 2 Continued

| Technology                                                                | Description                                                                                                                                                                 | References                                                                                                                                                                                                                                                                                                                                                                                                                                                                                                                                                                                              |
|---------------------------------------------------------------------------|-----------------------------------------------------------------------------------------------------------------------------------------------------------------------------|---------------------------------------------------------------------------------------------------------------------------------------------------------------------------------------------------------------------------------------------------------------------------------------------------------------------------------------------------------------------------------------------------------------------------------------------------------------------------------------------------------------------------------------------------------------------------------------------------------|
| Use of soy protein isolate nanoparticles                                  | Soy protein isolate nanoparticles have been proposed as a promising carrier to facilitate the oral delivery of B-12                                                         | Zhang et al (2015) <sup>153</sup>                                                                                                                                                                                                                                                                                                                                                                                                                                                                                                                                                                       |
| Alternative routes of administration<br>Intranasal administration of B-12 | Compositions have been designed for nasal administration                                                                                                                    | Wenig (1986) <sup>154</sup> , Quay et al (2016) <sup>155</sup> , Riepma (2014) <sup>156</sup> , Patel et al (2012) <sup>157</sup> , De Castele and Gerike (2006) <sup>158</sup> , Berenguer Huertas (1995) <sup>159</sup> , Wenig (1986) <sup>160</sup> , Van den Berg et al (2003) <sup>161</sup> , Pisal et al (2004) <sup>162</sup> , Garcia-Arieta et al (2001) <sup>163</sup> , van Asselt et al (1998) <sup>164</sup> , Slot et al (1997) <sup>165</sup> , Wenig (1987) <sup>166</sup> , Zeltman (2008) <sup>167</sup> , Madhaiyan et al (2013) <sup>168</sup> , Yang et al (2011) <sup>169</sup> |
| Transdermal administration of B-12                                        | Formulations and devices (transdermal patch). Main principle based on encapsulation in nano-reservoirs to release the vitamin in small quantities and in a sustained manner |                                                                                                                                                                                                                                                                                                                                                                                                                                                                                                                                                                                                         |
| Transmucosal administration of B-12                                       | Solid compositions comprising B-12 permeation enhancers (ie, isopropyl myristate), a mucoadhesive agent, and a penetration enhancer (chitosan)                              | Daud et al (2017) <sup>170</sup> , Gerike and De Castele (2007) <sup>171</sup>                                                                                                                                                                                                                                                                                                                                                                                                                                                                                                                          |
| Sublingual or buccal administration of B-12                               | B-12 formulations including propylene glycol, a solid adsorbent, and a solid water-soluble excipient                                                                        | McCarty (2014) <sup>172</sup>                                                                                                                                                                                                                                                                                                                                                                                                                                                                                                                                                                           |
| Buccal bioadhesive devices                                                | B-12-loaded buccoadhesive devices and films have been proposed                                                                                                              | Tiwari et al (1999) <sup>173</sup> , Mohamad et al (2017) <sup>174</sup>                                                                                                                                                                                                                                                                                                                                                                                                                                                                                                                                |

Abbreviation: IF, intrinsic factor.

Microbiological technologies include the natural enrichment of beverages with multiple vitamins by fermentation<sup>135–138</sup> or probiotics. Some formulations include at least 1 probiotic bacterial strain belonging to the species *Lactobacillus reuteri*,<sup>139,140</sup> *Propionibacterium jensenii*,<sup>141</sup> *Propionibacterium freudenreichii*,<sup>142</sup> and probiotic lactic acid bacterium from kanjika,<sup>143</sup> which are B-12 producers. Genetically modified microorganisms have been described.<sup>144–147</sup> However, there is uncertainty about how useful and effective these technologies are for improving B-12 bioavailability.

**Encapsulation techniques.** Methods for delivering B-12 via a suspension or emulsion of water-soluble vitamins and/or minerals in edible oils have been developed.<sup>148,149</sup> Particles containing the water-soluble fraction are coated with edible oils as a means to improve absorption through an increased resistance to degradation in the acidic environment of the stomach. A chitosan derivative capable of being specifically absorbed by the small intestine, as well as a preparation method and a drug-carrying nanoparticle of the derivative, has been proposed.<sup>150</sup> In vivo application of chitosan to improve bioavailability of cyanocobalamin has been demonstrated in rats.<sup>151</sup> Goto et al<sup>151</sup> showed that the bioavailability of B-12 was  $0.6 \pm 0.2\%$  when the chitosan-free B-12 solution was administered, whereas it increased to

$10.5 \pm 3.3\%$  when chitosan was dissolved in the B-12 solution at a concentration of 1%. A method exists for orally administering a sustained-release nutritional supplement containing B-12 based on hydrogels and hydrophilic polymers whereby the encapsulated vitamin is slowly released starting in the stomach and continuing into the upper intestinal tract, elevating B-12 in plasma for at least 12 hours after ingestion.<sup>152</sup> Finally, soy protein isolate nanoparticles have been proposed as a promising carrier to facilitate the oral delivery of B-12 by improving its intestinal transport and absorption. B-12 transport across Caco-2 cell monolayers was increased 2- to 3-fold after nanoencapsulation, depending on particle size, with smaller particles better absorbed ( $30 > 100 > 180$  nm soy protein isolate nanoparticles).<sup>153</sup> However, clinical substantiation of this technology in humans has not yet been demonstrated.

**Alternative routes of administration.** To avoid the barriers existing in oral administration, the following technologies were used: intranasal administration of B-12<sup>154–166</sup>; transdermal administration of B-12 through formulations and devices (transdermal patch)<sup>167–169</sup>; transmucosal administration of B-12<sup>170,171</sup>; sublingual or buccal administration of a B-12 formulation<sup>172</sup>; and buccal bioadhesive devices.<sup>173,174</sup> There is uncertainty about how many of these have

been clinically tested, and evidence for improvements of absorption or status in humans is limited.

### Strengths and limitations of this review

This narrative review focused on a broad topic. The systematic search was based on specified comprehensive sources, with an explicit search approach and a criterion-based selection, uniformly applied. The synthesis of the information was qualitative, and the inferences were based on evidence. A unique aspect of this review was the incorporation of an exhaustive search of patents. Furthermore, the review was not restricted to specific interventions or exposures, comparators, outcomes, or settings, which allowed for identification of a high spectrum of available evidence and activity in the field of B-12 bioavailability and technologies to enhance it.

It was not possible to synthesize the information quantitatively as recommended for systematic reviews (Table S1 in the Supporting Information online).<sup>175</sup> We acknowledge that it is possible that some available evidence was not identified in the search, and there may be risk of publication bias.

### Future perspectives

Technologies are highly desired for improving B-12 absorption in elderly individuals with B-12 absorption problems and for those with malabsorption associated with reduced secretion of IF and low dietary intake of B-12. In the case of advanced gastric problems, a technology such as SNAC may be effective as a single oral solution. Questions remain about the methods and technologies that would be most effective for increasing absorption in subgroups of apparently healthy populations, such as infants, young children, nonpregnant women, and pregnant women. Intrinsic factor deserves special attention in the context of both methods and technologies. Ideally, technologies to enhance B-12 absorption must take into consideration the role of B-12-specific binding glycoproteins with high affinity for B-12 in the alkaline medium of the duodenum.<sup>176</sup>

Several approaches have considered individual or mixtures of chemical forms of B-12, including cyanocobalamin, aquacobalamin, 5-deoxyadenosylcobalamin, adenosylcobalamin, methylcobalamin, and hydroxocobalamin.<sup>111,112,120–123,128–130,143,151–166</sup> There is not yet clarity about differences in absorption and metabolism of these chemical forms of B-12 and their capacity to accumulate in tissues and improve status.<sup>177–179</sup> Development or optimization of existing strategies are needed to improve basic physiological knowledge (eg, to understand how B-12 absorption in young infants is

related to haptocorrin [present in high amounts in human milk]<sup>180</sup> and/or TC [which binds cow milk B-12] and to confirm the low percentage of absorption of B-12 from human milk and mechanisms involved in passive diffusion).<sup>181,182</sup> Advances are needed to study appropriate interventions to mitigate B-12 deficiency (eg, to measure the extent to which the limited absorption capacity of B-12 in healthy individuals might explain some of the high prevalence of B-12 deficiency worldwide); to study differences between B-12 analogs<sup>183</sup>; to further improve methods to detect and quantify food-bound malabsorption; to investigate the role of the microbiota; to assess and understand bioavailability values; and to interpret relationships between intake and status.<sup>184</sup>

Improvement of clinical study designs to assess the efficacy of new technologies to enhance B-12 absorption (eg, assessments of clinical or functional outcomes in well-designed, double-blind, randomized controlled clinical trials) and validation of new technologies that attempt to enhance absorption of crystalline B-12 are needed. Also needed are appropriate assessment tests to set more accurate dietary requirements. Recommended dietary intakes of B-12 are approximately 2.0–2.5 µg/day for adults, assuming approximately 50% bioavailability from the diet.<sup>185</sup> Is this 50% independent of the dietary source and method of delivery, such as frequent smaller doses versus daily larger doses? Improving the accuracy of the recommended dietary intakes for B-12, as well as knowledge of the bioavailability of current strategies for B-12 delivery, could benefit current intervention programs.<sup>186,187</sup> A recent national wheat flour fortification program that included B-12<sup>188</sup> showed surprisingly large increases in plasma and breast milk B-12 at the end of 1 year, suggesting that the recommended levels of addition were higher than predicted or necessary. In flour fortification programs, usual intake is likely to be 1–2 µg/day, so absorption from fortified flour is usually estimated at around 50%. However, absorption from repeated small amounts of fortified food appears to be >50%. This requires verification.

### CONCLUSION

This work provides a critical review of the available literature on methods to measure the absorption of B-12 and of technologies to enhance its absorption. Absorption tests are important for assessing and interpreting bioavailability values, setting dietary requirements, and interpreting relationships between intake and status of the vitamin. Advances in the development of formulations, technologies, and discoveries are needed to confirm the utility of agents whose function

is to enhance gastrointestinal absorption and therefore improve B-12 status and protect health.

## Supporting Information

### Table S1 Characteristics of narrative and systematic literature reviews versus present review

## Acknowledgments

Dominique Leneuf based at the Nestlé Research Center is acknowledged for her excellent work conducting the exhaustive patent search.

**Author contributions.** A.B. participated in the concept and design of the study, executed the systematic search of scientific articles, interpreted data, and wrote the manuscript. E.H. participated in the concept and design of the study, supervised the execution of the systematic search of patents, interpreted data, and provided input to the drafts of the manuscript. I.S.-Z., N.G., and L.H.A. participated in the concept of the study, interpreted data, and provided input to the drafts of the manuscript. All authors read and approved the final version of the manuscript. A.B. has final responsibility for all parts of the manuscript.

**Funding.** Funding for this study was provided by the Nestlé Research Center (Lausanne, Switzerland).

**Declaration of interest.** A.B. is affiliated with I.M. Sechenov First Moscow State Medical University, Moscow, Russia, and served as a consultant for this review. E.H., I.S.-Z., and N.G. are affiliated with the Nestlé Research Center, Lausanne, Switzerland. L.H.A. has no conflict of interest to declare.

## REFERENCES

- Allen LH. How common is vitamin B-12 deficiency? *Am J Clin Nutr*. 2009;89:693S–696S.
- Green R, Allen LH, Björke-Monsen AL, et al. Vitamin B12 deficiency. *Nat Rev Dis Primers*. 2017;3:17040.
- Dror DK, Allen LH. Effect of vitamin B12 deficiency on neurodevelopment in infants: current knowledge and possible mechanisms. *Nutr Rev*. 2008;66:250–255.
- Carmel R. Cobalamin, the stomach, and aging. *Am J Clin Nutr*. 1997;66:750–759.
- Selhub J, Jacques PF, Dallal G, et al. The use of blood concentrations of vitamins and their respective functional indicators to define folate and vitamin B12 status. *Food Nutr Bull*. 2008;29(2 suppl):S67–S73.
- Carmel R. Efficacy and safety of fortification and supplementation with vitamin B12: biochemical and physiological effects. *Food Nutr Bull*. 2008;29(2 suppl):S177–S187.
- Tanner SM, Li Z, Perko JD, et al. Hereditary juvenile cobalamin deficiency caused by mutations in the intrinsic factor gene. *Proc Natl Acad Sci U S A*. 2005;102:4130–4133.
- Carmel R. Prevalence of undiagnosed pernicious anemia in the elderly. *Arch Intern Med*. 1996;156:1097–1100.
- Carmel R, Perez-Perez GI, Blaser MJ. *Helicobacter pylori* infection and food-cobalamin malabsorption. *Digest Dis Sci*. 1994;39:309–314.
- Suter PM, Golner BB, Goldin BR, et al. Reversal of protein-bound vitamin B12 malabsorption with antibiotics in atrophic gastritis. *Gastroenterology*. 1991;101:1039–1045.
- Sarari AS, Farraj MA, Hamoudi W, et al. *Helicobacter pylori*, a causative agent of vitamin B12 deficiency. *J Infect Dev Ctries*. 2008;2:346–349.
- Krasinski SD, Russell RM, Samloff IM, et al. Fundic atrophic gastritis in an elderly population. Effect on hemoglobin and several serum nutritional indicators. *J Am Geriatr Soc*. 1986;34:800–806.
- Baik HW, Russell RM. Vitamin B12 deficiency in the elderly. *Annu Rev Nutr*. 1999;19:357–377.
- Ward MG, Kariyawasam VC, Mogan SB, et al. Prevalence and risk factors for functional vitamin B12 deficiency in patients with Crohn's disease. *Inflamm Bowel Dis*. 2015;21:2839–2847.
- Duerksen DR, Fallows G, Bernstein CN. Vitamin B12 malabsorption in patients with limited ileal resection. *Nutrition*. 2006;22:1210–1213.
- Kwon Y, Kim HJ, Lo Menzo E, et al. Anemia, iron and vitamin B12 deficiencies after sleeve gastrectomy compared to Roux-en-Y gastric bypass: a meta-analysis. *Surg Obes Relat Dis*. 2014;10:589–597.
- Nielsen MJ, Rasmussen MR, Andersen CB, et al. Vitamin B12 transport from food to the body's cells—a sophisticated, multistep pathway. *Nat Rev Gastroenterol Hepatol*. 2012;9:345–354.
- Dharmarajan TS, Norkus EP. Does long-term PPI use result in vitamin B12 deficiency in elderly individuals? *Nat Clin Pract Gastroenterol Hepatol*. 2008;5:604–605.
- Lam JR, Schneider JL, Zhao W, et al. Proton pump inhibitor and histamine 2 receptor antagonist use and vitamin B12 deficiency. *JAMA*. 2013;310:2435–2442.
- Food Fortification Initiative. Global Fortification Data Exchange. Map: Count of Nutrients in Fortification Standards. <http://www.fortificationdata.org/map-number-of-nutrients/>. Accessed September 26, 2017.
- Selhub J, Morris MS, Jacques PF, et al. Folate-vitamin B-12 interaction in relation to cognitive impairment, anemia, and biochemical indicators of vitamin B-12 deficiency. *Am J Clin Nutr*. 2009;89:702S–706S.
- Selhub J, Morris MS, Jacques PF. In vitamin B12 deficiency, higher serum folate is associated with increased total homocysteine and methylmalonic acid concentrations. *Proc Natl Acad Sci U S A*. 2007;104:19995–20000.
- Miller JW, Garrod MG, Allen LH, et al. Metabolic evidence of vitamin B-12 deficiency, including high homocysteine and methylmalonic acid and low holotranscobalamin, is more pronounced in older adults with elevated plasma folate. *Am J Clin Nutr*. 2009;90:1586–1592.
- Solomon LR. Advanced age as a risk factor for folate-associated functional cobalamin deficiency. *J Am Geriatr Soc*. 2013;61:577–582.
- Brito A, Verdugo R, Hertrampf E, et al. Vitamin B-12 treatment of asymptomatic, deficient, elderly Chileans improves conductivity in myelinated peripheral nerves, but high serum folate impairs vitamin B-12 status response assessed by the combined indicator of vitamin B-12 status. *Am J Clin Nutr*. 2016;103:250–257.
- Morris MS, Selhub J, Jacques PF. Vitamin B-12 and folate status in relation to decline in scores on the mini-mental state examination in the Framingham Heart Study. *J Am Geriatr Soc*. 2012;60:1457–1464.
- Yajnik CS, Deshpande SS, Jackson AA, et al. Vitamin B12 and folate concentrations during pregnancy and insulin resistance in the offspring: the Pune Maternal Nutrition Study. *Diabetologia*. 2008;51:29–38.
- Selhub J, Rosenberg IH. Excessive folic acid intake and relation to adverse health outcome. *Biochimie*. 2016;126:71–78.
- Fedosov SN, Fedosov NU, Krautler B, et al. Mechanisms of discrimination between cobalamins and their natural analogues during their binding to the specific B12-transporting proteins. *Biochemistry*. 2007;46:6446–6458.
- Bateson MC, Bouchier IA. Stomach. In: *Clinical Investigations in Gastroenterology*. New York: Springer International, 2017:35–46.
- Aminoff M, Carter JE, Chadwick RB, et al. Mutations in CUBN, encoding the intrinsic factor-vitamin B12 receptor, cubilin, cause hereditary megaloblastic anaemia 1. *Nat Genet*. 1999;21:309–313.
- Tanner SM, Aminoff M, Wright FA, et al. Amnionless, essential for mouse gastrulation, is mutated in recessive hereditary megaloblastic anemia. *Nat Genet*. 2003;33:426–429.
- Beedholm-Ebsen R, van de Wetering K, Hardtle T, et al. Identification of multidrug resistance protein 1 (MRP1/ABCC1) as a molecular gate for cellular export of cobalamin. *Blood*. 2010;115:1632–1639.
- Carmel R. Current concepts in cobalamin deficiency. *Annu Rev Med*. 2000;51:357–375.
- Adobe Illustrator. Version 11. San Jose: Adobe Systems Incorporated; 2003.
- Chanarin I. *The Megaloblastic Anemias*. Oxford, UK: Blackwell Scientific; 1969.
- Corbus HF, Nielson H Jr. A simplified method for the urinary excretion test of absorption of cobalt 60 labelled vitamin B12. *Calif Med*. 1958;89:400–401.
- Scudamore HH, Hagedorn AB, Wollaeger EE, et al. Diverticulosis of the small intestine and macrocytic anemia with report of two cases and studies on absorption of radioactive vitamin B12. *Gastroenterology*. 1958;34:66–84.
- Reizenstein PG, Cronkite EP, Cohn SH. Measurement of absorption of vitamin B12 by whole-body gamma spectrometry. *Blood*. 1961;18:95–101.



40. Coupland WW. Plasma radioactivity after radioactive vitamin B12 given orally. *Med J Aust.* 1966;1:1020–1023.
41. Woodliff HJ, Armstrong BK. Vitamin B12 absorption studies: comparison of <sup>57</sup>Co vitamin B12 plasma levels, urinary excretion and faecal excretion. *Med J Aust.* 1966;1:1023–1025.
42. Forshaw J, Harwood L. Measurement of intestinal absorption of <sup>57</sup>-Co vitamin B-12 by serum counting. *J Clin Pathol.* 1966;19:606–609.
43. Mastynska M, Dzwonkowski J, Woszczyk J. [Experimental studies on the absorption of vitamin B 12 in the small intestine]. *Pol Tyg Lek.* 1968;23:537–538 (Polish).
44. Donaldson D, Lascelles PT. An assessment of serum <sup>57</sup>Co cyanocobalamin as an index of vitamin B12 absorption. *J Clin Pathol.* 1968;21:792.
45. Pierotti T, Bajard-Pellotier F. [Study of blood absorption of labelled vitamin B12]. *Rev Fr Etud Clin Biol.* 1969;14:602–606 (French).
46. Kharat'ian AM, Volovo' VL. [Some aspects of studying vitamin B 12 metabolism using radioisotope labels]. *Sov Med.* 1970;33:16–22 (Russian).
47. Kharat'ian AM, Volovo' VL. [Methods of the diagnostic use of vitamin B 12-Co 58 in clinical medicine]. *Probl Gematol Pereliv Krovi.* 1972;17:54–59 (Russian).
48. Doscherholmen A, McMahon J, Ripley D. Vitamin B12 assimilation from chicken meat. *Am J Clin Nutr.* 1978;31:825–830.
49. Heyssel RM, Bozian RC, Darby WJ, et al. Vitamin B12 turnover in man. The assimilation of vitamin B12 from natural foodstuff by man and estimates of minimal daily dietary requirements. *Am J Clin Nutr.* 1966;18:176–184.
50. Kulkarni VN, Mehta DJ, Kulkarni RD, et al. Vitamin B12 absorption studies using radioactive vitamin B12: comparison of whole body retention and urinary excretion after flushing dose (Schilling's test). *Indian J Physiol Pharmacol.* 1976;20:59–63.
51. Bozian RC, Ferguson JL, Heyssel RM, et al. Evidence concerning the human requirement for vitamin B12. Use of the whole body counter for determination of absorption of vitamin B12. *Am J Clin Nutr.* 1963;12:117–129.
52. Belcher EH, Anderson BB, Robinson CJ. The measurement of gastro-intestinal absorption of Co58-labelled vitamin B12 by whole body counting. *Nucl Med (Stuttgart).* 1963;3:349–55.
53. Tappin JW, Rahman IA, Rogers K. A study of absorption of vitamin B12 using a whole-body spectrometer. *Br J Radiol.* 1966;39:295–301.
54. Belcher EH. Whole body radioactivity measurement techniques as applied to the study of gastrointestinal absorption and excretion. *Nucl Med (Stuttgart).* 1967;1–5.
55. Meyer BJ, Jansen CR, van der Merwe CJ, et al. Application of whole-body gamma spectrometry to vitamin B12 absorption. *S Afr Med J.* 1968;42:50–52.
56. Naversten Y, Lidén K, Ståhlberg KG, et al. The study of <sup>57</sup>-Co-vitamin B12-absorption using a whole-body counter. *Phys Med Biol.* 1969;14:441–453.
57. Cottrill MF, Wells DG, Trott NG, et al. Radioactive vitamin B12 absorption studies: comparison of the whole-body retention, urinary excretion, and eight-hour plasma levels of radioactive vitamin B12. *Blood.* 1971;38:604–613.
58. Morishita R, Furumatsu C. [Vitamin B12 absorption test by a whole body counter (plastic scintillator). (1) Experimental study]. *Kaku Igaku.* 1975;12:367–375 (Japanese).
59. Smith T, Hesp R. Measurement of <sup>57</sup>Co-labelled vitamin B12 using a liquid-scintillator whole-body counter. *Br J Radiol.* 1979;52:832–835.
60. Mehta BC, Gupta SM, Ramnath SR, et al. Measurement of B12 absorption by whole body counter: effect of B12 body store saturation. *Indian J Gastroenterol.* 1982;1:16–18.
61. Cardarelli JA, Slingerland DW, Burrows BA, et al. Measurement of total-body cobalt-<sup>57</sup> vitamin B12 absorption with a gamma camera. *J Nucl Med.* 1985;26:941–943.
62. Schilling RF. Intrinsic factor studies II. The effect of gastric juice on the urinary excretion of radioactivity after the oral administration of radioactive vitamin B12. *J Lab Clin Med.* 1953;42:860.
63. Castrillón-Oberndorfer-Stüber H, Finke J, Hoffmann P, et al. [Urinary excretion study with radioactive vitamin B 12 (Schilling test) in internal, neurologic and psychiatric diseases]. *Nucl Med (Stuttgart).* 1967;85–96 (German).
64. Schilling test of vitamin B12 absorption. *Br Med J.* 1969;1:300–301.
65. Chiba K. [Schilling test for absorption of <sup>57</sup>-Co-vitamin B12]. *Nihon Rinsho.* 1979;(suppl):2320–2322 (Japanese).
66. Bublitz G. [The radio-vitamin B-12 resorption-urinary excretion test (Schilling test)]. *Röntgenpraxis.* 1964;17:77–83 (German).
67. Nabet P, Wolff R. Use of Schilling test in the study of intestinal absorption of vitamin B12 in rats. *C R Seances Soc Biol Fil.* 1958;152:989–993.
68. McDonald JW, Barr RM, Barton WB. Spurious Schilling test results obtained with intrinsic factor enclosed in capsules. *Ann Intern Med.* 1975;83:827–829.
69. Fish MB, Pollycove M, Wallerstein RO, et al. Simultaneous measurement of free and intrinsic factor (IF) bound vitamin B12 (B12) absorption; absolute quantitation with incomplete stool collection and rapid relative measurement using plasma B12 (IF): B 12 absorption ratio. *J Nucl Med.* 1973;14:568–575.
70. Strauchen JA. An augmented Schilling test in the diagnosis of pernicious anaemia. *Lancet.* 1976;2:545–547.
71. Ganatra RD, Sundaram K, Desai KB, et al. Determination of absorption of vitamin B12 by a double isotope tracer technique. *J Nucl Med.* 1965;6:459–464.
72. Boddy K, Will G, Holmes BM. An evaluation of <sup>57</sup>-Co-labelled vitamin B12 in a double tracer test of absorption using a whole-body monitor. *Phys Med Biol.* 1969;14:455–462.
73. Campbell CB, Craswell PW. A double isotope method to measure vitamin B 12 absorption. *Australas Ann Med.* 1970;19:42–46.
74. Boddy K, Mahaffy ME, Will G. A double-tracer test of the oral absorption of <sup>57</sup> Co- and <sup>58</sup> Co-vitamin B 12 using a whole-body monitor: clinical experience and technical factors. *Am J Clin Nutr.* 1972;25:703–708.
75. Itaya H, Fukuda M, Inaba M, et al. [Studies of B12 absorption test with dual-isotope method]. *Kaku Igaku.* 1976;13:479–488 (Japanese).
76. Knudsen L, Hippe E. Vitamin B12 absorption evaluated by a dual isotope test (Dicopac). Results of radioactivity measurements in plasma and in urine. *Scand J Haematol.* 1974;13:287–293.
77. Veeger W, Abels J, Hellemans N, et al. Effect of sodium bicarbonate and pancreatin on the absorption of vitamin B12 and fat in pancreatic insufficiency. *N Engl J Med.* 1962;267:1341–1344.
78. Laustsen J, Fällingborg J. False normal Schilling tests in vitamin B12 absorption deficiency. *Lancet.* 1983;322:518.
79. Cionini L. Reliability of the Schilling test in evaluation of intestinal absorption of vitamin B 12. *Minerva Nucl.* 1965;9:252–258 (Italian).
80. Shafer RB, Swaim WR, Ripley D, et al. Radioactive vitamin B 12 absorption studies: population distribution of plasma B 12 absorption and serum B 12. *Proc Soc Exp Biol Med.* 1972;141:249–252.
81. Henze E, Männer S, Clausen M, et al. The Schilling test cannot be replaced by an absorption test with unlabeled vitamin B12. *Klin Wochenschr.* 1988;66:332–336.
82. Hjelt K. Reliability of a new technique for the determination of vitamin B12 absorption in children: single stool sample test—a double isotope technique. *J Pediatr Gastroenterol Nutr.* 1986;5:268–273.
83. Watson WS, Adams JF. A fast method of measuring vitamin B12 absorption using a whole-body counter. *Clin Phys Physiol Meas.* 1983;4:69–77.
84. Hippe E, Brynskov J, Gimsing P, et al. [Determination of vitamin B12 (cobalamin) absorption by means of a simple double-isotope technic. An alternative to Schilling's test]. *Ugeskr Laeger.* 1986;148:2473–2477 (Danish).
85. Doscherholmen A, McMahon J, Ripley D. Inhibitory effect of eggs on vitamin B12 absorption: description of a simple ovalbumin <sup>57</sup>Co-vitamin B12 absorption test. *Br J Haematol.* 1976;33:261–272.
86. Carmel R. Malabsorption of food cobalamin. *Baillieres Clin Haematol.* 1995;8:639–655.
87. Carmel R. The disappearance of cobalamin absorption testing: a critical diagnostic loss. *J Nutr.* 2007;137:2481–2484.
88. Hardlei TF, Mørkbak AL, Bor MV, et al. Assessment of vitamin B(12) absorption based on the accumulation of orally administered cyanocobalamin on transcobalamin. *Clin Chem.* 2010;56:432–436.
89. Hvas AM, Mørkbak AL, Hardlei TF, et al. The vitamin B12 absorption test, Cobsorb, identifies patients not requiring vitamin B12 injection therapy. *Scand J Clin Lab Invest.* 2011;71:432–438.
90. Lindgren A, Kilander A, Bagge E, et al. Holotranscobalamin—a sensitive marker of cobalamin malabsorption. *Eur J Clin Invest.* 1999;29:321–329.
91. Bor MV, Nexø E, Hvas AM. Holo-transcobalamin concentration and transcobalamin saturation reflect recent vitamin B12 absorption better than does serum vitamin B12. *Clin Chem.* 2004;50:1043–1049.
92. Bor MV, Cetin M, Aytac S, et al. Nonradioactive vitamin B12 absorption test evaluated in controls and in patients with inherited malabsorption of vitamin B12. *Clin Chem.* 2005;51:2151–2155.
93. Hvas AM, Mørkbak AL, Nexø E. Plasma holotranscobalamin compared with plasma cobalamins for assessment of vitamin B12 absorption; optimisation of a non-radioactive vitamin B12 absorption test (CobaSorb). *Clin Chim Acta.* 2007;376:150–154.
94. von Castel-Roberts KM, Mørkbak AL, Nexø E, et al. Holo-transcobalamin is an indicator of vitamin B-12 absorption in healthy adults with adequate vitamin B-12 status. *Am J Clin Nutr.* 2007;85:1057–1061.
95. Bhat DS, Thuse NV, Lubree HG, et al. Increases in plasma holotranscobalamin can be used to assess vitamin B-12 absorption in individuals with low plasma vitamin B-12. *J Nutr.* 2009;139:2119–2123.
96. Greibe E, Nexø E. Vitamin B12 absorption judged by measurement of holotranscobalamin, active vitamin B12: evaluation of a commercially available EIA kit. *Clin Chem Lab Med.* 2011;49:1883–1885.
97. Berglund L, Nexø E, inventors; Berglund Lars E, Ebba Nexø, assignee. Non-radioactive schilling test. US patent 20 060 166 271. July 27, 2006.
98. Carkeet C, Dueker SR, Lango J, et al. Human vitamin B12 absorption measurement by accelerator mass spectrometry using specifically labeled (14) C-cobalamin. *Proc Natl Acad Sci U S A.* 2006;103:5694–5699. Erratum in: *Proc Natl Acad Sci U S A.* 2006;103:10526.
99. Chanarin I. *The Megaloblastic Anemias.* Oxford, UK: Blackwell Scientific; 1979.
100. Institute of Medicine. *Dietary Reference Intakes: Thiamin, Riboflavin, Niacin, Vitamin B6, Folate, Vitamin B12, Pantothenic Acid, Biotin, and Choline.* Washington, DC: National Academies; 1998.
101. Berlin H, Berlin R, Brante G. Oral treatment of pernicious anemia with high doses of vitamin B12 without intrinsic factor. *Acta Med Scand.* 1968;184:247–258.

102. Allen LH. Bioavailability of vitamin B12. *Int J Vitam Nutr Res*. 2010;80:330–335.
103. Doets EL, In 't Veld PH, Szczecinska A, et al. Systematic review on daily vitamin B12 losses and bioavailability for deriving recommendations on vitamin B12 intake with the factorial approach. *Ann Nutr Metab*. 2013;62:311–322.
104. Goo T, Akiba Y, Kaunitz JD. Mechanisms of intragastric pH sensing. *Curr Gastroenterol Rep*. 2010;12:465–470.
105. Schubert ML. Gastric secretion. *Curr Opin Gastroenterol*. 2010;26:598–603.
106. Ding X, Rath P, Angelo R, et al. Oral absorption enhancement of cromolyn through noncovalent complexation. *Pharm Res*. 2004;21:2196–2206.
107. Castelli MC, Wong DF, Friedman K, et al. Pharmacokinetics of oral cyanocobalamin formulated with sodium N-[8-(2-hydroxybenzoyl)amino]caprylate (SNAC): an open-label, randomized, single-dose, parallel-group study in healthy male subjects. *Clin Ther*. 2011;33:934–945.
108. Castelli MC, Friedman K, Sherry J, et al. Comparing the efficacy and tolerability of a new daily oral vitamin B12 formulation and intermittent intramuscular vitamin B12 in normalizing low cobalamin levels: a randomized, open-label, parallel-group study. *Clin Ther*. 2011;33:358–371.
109. Ellenbogen L, Williams WL, inventors; American Cyanamid Co, assignee. Process of recovering intrinsic factor from pyloric mucosa. US patent 3 015 608 A. January 2, 1962.
110. Oertli R, inventor; Oss Organon Lab, assignee. Process for the preparation of biologically active preparations. GB-771068 A. March 27, 1957.
111. Collins DA, inventor; Mayo Foundation for Medical Education and Research, Collins DA, assignees. Adenosyl-cobalamin fortified compositions. WO/2003/00010. March 1, 2003.
112. Russell-Jones GJ, Westwood SW, Gould AR, et al, inventors; Biotech Australia Pty. Limited, assignee. Amplification of the vitamin B12 uptake system using polymers. WO/1994/027641 A1. December 8, 1994.
113. Seetharam B, Bose S, inventors; MCW Research Foundation, assignee. Transcobalamin mediated transport of vitamins B12 in intrinsic factor or receptor deficient patient. US patent 6 183 723 B1. February 6, 2001.
114. Serfontein WJ, inventor. Vesta Medicines (Proprietary) Limited, assignee. Pharmaceutical preparations for lowering homocysteine levels, containing vitamin B6, folic acid and vitamin B12. EP0595005 A1. May 4, 1994.
115. Habberfield AD, Kinstler OB, Pitt CG, inventors. Amgen Inc, assignee. Conjugates of vitamin B12 and proteins. WO/1996/04016 A1. February 15, 1996.
116. Hine B, Boggs I, Green R, et al. Transcobalamin derived from bovine milk stimulates apical uptake of vitamin B12 into human intestinal epithelial cells. *J Cell Biochem*. 2014;115:1948–1954.
117. Williams DL, Spray GH. The absorption of (58Co) cyanocobalamin by unweaned rats. *Br J Nutr*. 1968;22:297–301.
118. Yuhong L, assignee. Modified formula and use of Vitamin b12 oral preparation. CN102526088 A. July 4, 2012.
119. Castelli C, Kragie L, inventors; Emisphere Technologies, Inc, assignee. Method of treating vitamin B12 deficiency. WO/2009/059188 A1. May 7, 2009.
120. Brown C, inventor; Bebaas, Inc, assignee. Vitamin B12 compositions. US patent 20 130 149 255 A1. June 13, 2013.
121. Brown C, inventor; Bebaas, Inc, assignee. Vitamin B12 Compositions. US patent 20 070 178 141 A1. August 2, 2007.
122. Brown C, inventor; Bebaas, Inc, assignee. Vitamin B12 compositions. WO/2007/030108. March 15, 2007.
123. Brown C, inventor; Bebaas, Inc, assignee. Vitamin B12 compositions. WO/2006/020291 A2. February 23, 2006.
124. Okuda K. Dose dependent effects of D-sorbitol on intestinal absorption of vit. B12. *Proc Soc Exp Biol Med*. 1961;108:816–819.
125. Okuda K, Hsu JM, Chow BF. Effect of feeding D-sorbitol on the intestinal absorption of vitamin B6 and vitamin B12 in rats. *J Nutr*. 1960;72:99–104.
126. Sorbitol and vitamin B12 absorption. *Nutr Rev*. 1959;17:188–190.
127. Sarti F, Müller C, Iqbal J, et al. Development and in vivo evaluation of an oral vitamin B12 delivery system. *Eur J Pharm Biopharm*. 2013;84:132–137.
128. Burge E, Copp R, inventors; Nestec SA, assignee. Modified release formulations. WO/2016/185413 A1. November 24, 2016.
129. Copp R, inventor; Nestec S.A., assignee. Immediate release formulations. WO/2016/185412 A1. November 24, 2016.
130. Koch H, Liu Z Jr, Ruiz JA, et al, inventors; Nestec S.A., Board of Supervisors of Louisiana State University and Agricultural and Mechanical College, assignees. Formulation for water-soluble vitamins to increase oral absorption and bioavailability. WO/2015/077511 A1. May 28, 2015.
131. Chokshi D, inventor; Pharmachem Laboratories, Inc, assignee. Compositions comprising glycoprotein matrix and active compound and methods for manufacture thereof. EP1222919 A2. July 17, 2002.
132. Davis BP, Gerstein LM, Rozeboom DL, et al. Enhanced absorption of oral vitamin B12 from a resin adsorbate administered to normal subjects. *J Manipulative Physiol Ther*. 1982;5:123–127.
133. Fedosov SN, Laursen NB, Nexø E, et al. Human intrinsic factor expressed in the plant *Arabidopsis thaliana*. *Eur J Biochem*. 2003;270:3362–3367.
134. Hvas AM, Buhl H, Laursen NB, et al. The effect of recombinant human intrinsic factor on the uptake of vitamin B12 in patients with evident vitamin B12 deficiency. *Haematologica*. 2006;91:805–808.
135. Hugenholtz J, Strachotta T, inventors; Coca-Cola Company, assignee. Compositions and methods for vitamin-rich fermentates. WO/2014/062961 A1. April 24, 2014.
136. Kelemen A, Jaksa I, Steffko B, et al, inventors; Kelemen A, Jaksa I, Steffko B, et al, assignees. Process for the treatment of fermentation broth containing vitamin B12 and other corrinoids and for the preparation of vitamin B12 concentrates. US patent 4 657 859. April 14, 1987.
137. Johan B, Szemler L, Szontagh T, et al. Process for the production of fermentation broth with increased vitamin B12 content by synchronizing the bacterium population. US patent 3 979 259. September 7, 1976.
138. Szemler L, Szekely D, Johan B, et al, inventors; Richter Gedeon Vegyeszet, assignee. Vitamin B12 concentrates. FR2062700. June 25, 1971.
139. Mogna G, Strozzi GP, Mogna L, inventors; Probiotal S.P.A., assignee. Vitamin B12 producing *Lactobacillus reuteri* strains. WO/2013/084052 A1. June 13, 2013.
140. Mogna G, Mogna L, Strozzi GP, inventors; Probiotal S.P.A., assignee. Vitamin B12 producing probiotic bacterial strains. WO/2011/154820. March 1, 2012.
141. Adams MC, Huang Y, inventors; University of Newcastle Research Associates (Tunra) Ltd, assignee. Probiotic *Propionibacterium jensenii* 702. WO/2004/001022. December 31, 2003.
142. Hugenschmidt S, Schwenninger SM, Lacroix C. Concurrent high production of natural folate and vitamin B12 using a co-culture process with *Lactobacillus plantarum* SM39 and *Propionibacterium freudenreichii* DF13. *Process Biochem*. 2011;46:1063–1070.
143. Madhu AN, Giribhattanavar P, Narayan MS, et al. Probiotic lactic acid bacterium from kanjika as a potential source of vitamin B12: evidence from LC-MS, immunological and microbiological techniques. *Biotechnol Lett*. 2010;32:503–506.
144. Zelder O, Schroeder H, Kloppeogge C, et al, inventors; Evonik Degussa GmbH, assignee. Microorganisms with deregulated vitamin b12 system. WO/2008/152016 A1. December 18, 2008.
145. Bijl HL, Sardjoepersad S, inventors; Dsm Ip Assets BV, assignee. Formulations comprising vitamin B12, method of production and use thereof. WO/2004/044215 A2. May 27, 2004.
146. Bijl HL, inventor; Gist Brocades Bv, assignee. Production and use of compositions comprising high concentrations of vitamin B12 activity. WO/1998/006868 A3. March 26, 1998.
147. Berglund LE, Petersen TE, Fedosov SN, et al, inventors; Cobento Biotech Aps, assignee. Transgenic plants expressing cobalamin binding proteins. WO/2003/006661 A2. January 23, 2003.
148. Schramm JH, McGrath JW Jr, inventors; Schramm JH, McGrath JW, assignee. Compositions comprising edible oils and vitamins and/or minerals and methods for making the compositions. US/2008/274175 A1. November 6, 2008.
149. Schramm JH, McGrath JW, Jr, inventors; Pbm Pharmaceuticals, Inc, assignee. Compositions comprising edible oils and vitamins and/or minerals and methods for making the compositions. WO/2005/112654 A2. December 1, 2005.
150. Yang L, Deng Y, Tan Y, et al, inventors; Sun Yat-sen University, assignee. Small intestine targeted absorption of chitosan derivatives, their preparation and drug-loaded nanoparticles. CN104031174. April 19, 2017.
151. Goto Y, Masuda A, Aiba T. In vivo application of chitosan to improve bioavailability of cyanocobalamin, a form of vitamin B12, following intrainestinal administration in rats. *Int J Pharm*. 2015;483:250–255.
152. Smidt CR, Mergens WJ, Castillo J, inventors; Shaklee Corporation, assignee. Nutritional dosage unit. WO/2009/035496 A1. March 19, 2009.
153. Zhang J, Field CJ, Vine D, et al. Intestinal uptake and transport of vitamin B12-loaded soy protein nanoparticles. *Pharm Res*. 2015;32:1288–1303.
154. Wenig J, inventor; Natestch Pharmaceutical Company, Inc, assignee. Aerosol compositions for nasal delivery of vitamin B12. WO/1986/005987 A1. October 23, 1986.
155. Quay SC, Go ZO, Aprile PC, et al, inventors; Par Pharmaceutical, assignee. Cyanocobalamin low viscosity aqueous formulations for intranasal delivery. CA2863377 C. August 9, 2016.
156. Riepma KA, inventor; Riepma KA, assignee. A pharmaceutical composition containing vitamin B12. WO/2014/084736 A1. June 5, 2014.
157. Patel KR, Patel MR, Shah PJ, inventors; Troikka Pharmaceuticals Limited, assignee. Nasal compositions of vitamin B12. WO/2012/056299. May 3, 2012.
158. De Castelee RV, Gierke M, inventors; Health Plus International, Inc, assignee. Nanofluidized B-12 composition and process for treating pernicious anemia. US patent 2006280761 A1. December 14, 2006.
159. Berenguer Huertas JL, inventor; Farmalider SA, assignee. System for the nasal administration of cyanocobalamine (vitamin B12). ES2074396 A1. September 1, 1995.
160. Wenig J, inventor; Natestch Pharmaceutical Company, Inc, assignee. Nasal compositions containing vitamin B 12. WO/1986/005988 A1. October 23, 1986.
161. Van den Berg MP, Merkus P, Romeijn SG, et al. Hydroxocobalamin uptake into the cerebrospinal fluid after nasal and intravenous delivery in rats and humans. *J Drug Target*. 2003;11:325–331.
162. Pisl SS, Paradkar AR, Mahadik KR, et al. Pluronic gels for nasal delivery of vitamin B12. Part I: preformulation study. *Int J Pharm*. 2004;270:37–45.
163. Garcia-Arieta A, Torrado-Santiago S, Goya L, et al. Spray-dried powders as nasal absorption enhancers of cyanocobalamin. *Biol Pharm Bull*. 2001;24:1411–1416.

164. van Asselt DZB, Merkus FWHM, Russel FGM, et al. Nasal absorption of hydroxocobalamin in healthy elderly adults. *Br J Clin Pharmacol*. 1998;45:83–86.
165. Slot WB, Merkus FW, Van Deventer SJ, et al. Normalization of plasma vitamin B12 concentration by intranasal hydroxocobalamin in vitamin B12-deficient patients. *Gastroenterology*. 1997;113:430–433.
166. Wenig J, inventor; Nasteck Pharm Co, assignee. Aerosol compositions for nasal delivery of vitamin B 12. EP0218679 A1. April 22, 1987.
167. Zeltman JD, inventor; Vita Sciences, LLC, assignee. Transdermal patch and method for delivery of vitamin B12. WO/2008/116004 A2. September 25, 2008.
168. Madhaiyan K, Sridhar R, Sundararajan S, et al. Vitamin B12 loaded polycaprolactone nanofibers: a novel transdermal route for the water soluble energy supplement delivery. *Int J Pharm*. 2013;444:70–76.
169. Yang Y, Kalluri H, Banga AK. Effects of chemical and physical enhancement techniques on transdermal delivery of cyanocobalamin (vitamin B12) in vitro. *Pharmaceutics*. 2011;3:474–484.
170. Daud A, Sapkal N, Daud L, et al, inventors; Zim Laboratories Limited, assignee. Improved mucosal delivery of vitamin B12. WO/2016/199165. February 9, 2017.
171. Gerike M, De Castele RV, inventors; Health Plus International Inc, assignee. Nanofluidized B-12 composition and process for treating pernicious anemia. WO/2007/103931 A3. November 29, 2007.
172. McCarty J, inventor; Pharmaceutical Productions Inc, assignee. Method of treating vitamin B12 deficiency. WO/2014/152504. September 25, 2014.
173. Tiwari D, Goldman D, Town C, et al. In vitro-in vivo evaluation of a controlled release buccal bioadhesive device for oral drug delivery. *Pharm Res*. 1999;16:1775–1780.
174. Mohamad SA, Sarhan HA, Abdelkader H, et al. Vitamin B12-loaded buccoadhesive films as a noninvasive supplement in vitamin B12 deficiency: in vitro evaluation and in vivo comparative study with intramuscular injection. *J Pharm Sci*. 2017;106:1849–1858.
175. Cook DJ, Mulrow CD, Haynes RB. Systematic reviews: synthesis of best evidence for clinical decisions. *Ann Intern Med*. 1997;126:376–380.
176. Wuerges J, Geremia S, Randaccio L. Structural study on ligand specificity of human vitamin B12 transporters. *Biochem J*. 2007;403:431–440.
177. Greibe E, Nexø E. Forms and amounts of vitamin B12 in infant formula: a pilot study. *PLoS One*. 2016;11:e0165458.
178. Kornerup LS, Fedosov SN, Juul CB, et al. Tissue distribution of oral vitamin B12 is influenced by B12 status and B12 form: an experimental study in rats. *Eur J Nutr* 2017; doi: 10.1007/s00394-017-1424-0.
179. Kornerup LS, Juul CB, Fedosov SN, et al. Absorption and retention of free and milk protein-bound cyano- and hydroxocobalamins. An experimental study in rats. *Biochimie* 2016;126:57–62.
180. Lildballe DL, Hardlei TF, Allen LH, et al. High concentrations of haptocorrin interfere with routine measurement of cobalamins in human serum and milk. A problem and its solution. *Clin Chem Lab Med*. 2009;47:182–187.
181. Adkins Y, Lonnerdal B. Mechanisms of vitamin B(12) absorption in breast-fed infants. *J Pediatr Gastroenterol Nutr*. 2002;35:192–198.
182. Adkins Y, Lonnerdal B. Potential host-defense role of a human milk vitamin B-12-binding protein, haptocorrin, in the gastrointestinal tract of breastfed infants, as assessed with porcine haptocorrin in vitro. *Am J Clin Nutr*. 2003;77:1234–1240.
183. Allen RH, Stabler SP. Identification and quantitation of cobalamin and cobalamin analogues in human feces. *Am J Clin Nutr*. 2008;87:1324–1335.
184. Degnan PH, Taga ME, Goodman AL. Vitamin B12 as a modulator of gut microbial ecology. *Cell Metab*. 2014;20:769–778.
185. Institute of Medicine. Dietary Reference Intakes: Thiamin, Riboflavin, Niacin, Vitamin B6, Folate, Vitamin B12, Pantothenic Acid, Biotin, and Choline. Washington, DC: National Academies; 2000.
186. Bor MV, Lydeking-Olsen E, Møller J, et al. A daily intake of approximately 6 µg vitamin B-12 appears to saturate all the vitamin B-12-related variables in Danish postmenopausal women. *Am J Clin Nutr*. 2006;83:52–58.
187. Bor MV, von Castel-Roberts KM, Kauwell GP, et al. Daily intake of 4 to 7 µg dietary vitamin B-12 is associated with steady concentrations of vitamin B-12-related biomarkers in a healthy young population. *Am J Clin Nutr*. 2010;91:571–577.
188. Shahab-Ferdows S, Engle-Stone R, Hampel D, et al. Regional, socioeconomic, and dietary risk factors for vitamin B-12 deficiency differ from those for folate deficiency in Cameroonian women and children. *J Nutr*. 2015;145:2587–2595.
